# Supplementary material for: Elucidating the Color of Rosé Wines Using Polyphenol-Targeted Metabolomics
Source: MDPI journal article supplement (doi:10.3390/molecules27041359), 2022-02-17
Supplement: s1 [file s1]

| <b>Phenolic compounds</b>                                                                              | codes |
|--------------------------------------------------------------------------------------------------------|-------|
| <b>Benzoic acids and ethyl esters (mg/L)</b>                                                           |       |
| protocatechuic acid                                                                                    | BA1   |
| protocatechuic acid ethyl ester                                                                        | BA2   |
| gallic acid                                                                                            | BA3   |
| gallic acid ethyl ester                                                                                | BA4   |
| vanillic acid                                                                                          | BA5   |
| syringic acid                                                                                          | BA6   |
| <b>Hydroxycinnamic acids (free and ethyl esters) (mg/L)</b>                                            |       |
| p-coumaric acid                                                                                        | HCA1  |
| p-coumaric acid ethyl ester (mg/L caffeic acid ethyl ester equivalent)                                 | HCA2  |
| caffeic acid                                                                                           | HCA3  |
| caffeic acid ethyl ester                                                                               | HCA4  |
| ferulic acid                                                                                           | HCA5  |
| <b>Hydroxycinnamoyl tartrates (mg/L)</b>                                                               |       |
| p-coumaroyltartaric acid (mg/L caffeoyltartaric acid equivalent)                                       | HCA6  |
| caffeoyltartaric acid                                                                                  | HCA7  |
| feruloyltartaric acid (mg/L caffeoyltartaric acid equivalent)                                          | HCA8  |
| 2-S-glutathionylcaffeoyltartaric acid (Grape Reaction Product) (mg/L caffeoyltartaric acid equivalent) | GRP   |
| <b>Stilbenoids (mg/L)</b>                                                                              |       |
| trans-piceid                                                                                           | ST1   |
| cis-piceid (mg/L trans-piceid equivalent)                                                              | ST2   |
| trans-resveratrol                                                                                      | ST3   |
| cis-resveratrol (mg/L trans-resveratrol equivalent)                                                    | ST4   |
| resveratrol dimer 1 (mg/L trans-resveratrol equivalent)                                                | ST5   |
| resveratrol dimer 2 (mg/L trans-resveratrol equivalent)                                                | ST6   |
| <b>Flavonols (mg/L)</b>                                                                                |       |
| quercetin 3-O-glucuronide (mg/L quercetin 3-O-glucoside equivalent)                                    | FLO1  |
| quercetin 3-O-glucoside                                                                                | FLO2  |
| myricetin 3-O-glucuronide (mg/L quercetin 3-O-glucoside equivalent)                                    | FLO3  |
| myricetin 3-O-glucoside (mg/L quercetin 3-O-glucoside equivalent)                                      | FLO4  |
| quercetin                                                                                              | FLO5  |
| <b>Dihydroflavonols (mg/L)</b>                                                                         |       |
| taxifolin                                                                                              | DHF1  |
| astilbin (mg/L quercetin 3-O-glucoside equivalent)                                                     | DHF2  |
| <b>Flavan-3-ol monomers and oligomers (mg/L)</b>                                                       |       |
| catechin                                                                                               | FLA1  |

|                                                             |      |
|-------------------------------------------------------------|------|
| epicatechin                                                 | FLA2 |
| procyanidin dimer B1 (mg/L procyanidin dimer B2 equivalent) | FLA3 |
| procyanidin dimer B2                                        | FLA4 |
| procyanidin dimer B3 (mg/L procyanidin dimer B2 equivalent) | FLA5 |
| procyanidin dimer B4 (mg/L procyanidin dimer B2 equivalent) | FLA6 |
| procyanidin dimer gallate (mg/L catechin equivalent)        | FLA7 |
| procyanidin trimer 1 (mg/L catechin equivalent)             | FLA8 |
| procyanidin trimer 2 (mg/L catechin equivalent)             | FLA9 |

#### **Flavan-3-ol phloroglucinolysis data**

|                                                    |      |
|----------------------------------------------------|------|
| total flavanol units (phloroglucinolysis) (mg/L)   | FLAT |
| mean degree of polymerisation (phloroglucinolysis) | mDP  |

#### **Anthocyanins (mg/L malvidin 3-O-glucoside equivalent or mg/L malvidin 3,5-diglucoside equivalent \*)**

|                                    |      |
|------------------------------------|------|
| cyanidin 3-O-glucoside             | AC1  |
| delphinidin 3-O-glucoside          | AC2  |
| petunidin 3-O-glucoside            | AC3  |
| peonidin 3-O-glucoside             | AC4  |
| malvidin 3-O-glucoside             | AC5  |
| cyanidin 3-O-acetylglucoside       | AC6  |
| delphinidin 3-O-acetylglucoside    | AC7  |
| petunidin 3-O-acetylglucoside      | AC8  |
| peonidin 3-O-acetylglucoside       | AC9  |
| malvidin 3-O-acetylglucoside       | AC10 |
| cyanidin 3-O-coumaroylglucoside    | AC11 |
| delphinidin 3-O-coumaroylglucoside | AC12 |
| petunidin 3-O-coumaroylglucoside   | AC13 |
| peonidin 3-O-coumaroylglucoside    | AC14 |
| malvidin 3-O-coumaroylglucoside    | AC15 |
| cyanidin 3-O-caffeoylglucoside     | AC16 |
| delphinidin 3-O-caffeoylglucoside  | AC17 |
| petunidin 3-O-caffeoylglucoside    | AC18 |
| peonidin 3-O-caffeoylglucoside     | AC19 |
| malvidin 3-O-caffeoylglucoside     | AC20 |
| cyanidin 3,5-diglucoside*          | AC21 |
| delphinidin 3,5-diglucoside*       | AC22 |
| petunidin 3,5-diglucoside*         | AC23 |
| peonidin 3,5-diglucoside*          | AC24 |
| malvidin 3,5-diglucoside*          | AC25 |

#### **Pyranoanthocyanins (mg/L malvidin-3-O-glucoside equivalent)**

|                                          |     |
|------------------------------------------|-----|
| pyranocyanidin 3-O-glucoside             | PY1 |
| pyranodelphinidin 3-O-glucoside          | PY2 |
| pyranopetunidin 3-O-glucoside            | PY3 |
| pyranopeonidin 3-O-glucoside             | PY4 |
| Pyranomalvidin 3-O-glucoside = vitisin B | PY5 |

|                                        |      |
|----------------------------------------|------|
| pyranocyanidin 3-O-acetylglucoside     | PY6  |
| pyranodelphinidin 3-O-acetylglucoside  | PY7  |
| pyranopetunidin 3-O-acetylglucoside    | PY8  |
| pyranopeonidin 3-O-acetylglucoside     | PY9  |
| pyranomalvidin 3-O-acetylglucoside     | PY10 |
| pyranopetunidin 3-O-coumaroylglucoside | PY11 |
| pyranopeonidin 3-O-coumaroyl-glucoside | PY12 |
| pyranomalvidin 3-O-coumaroylglucoside  | PY13 |

**Carboxypyrananthocyanins (mg/L malvidin-3-O-glucoside equivalent)**

|                                                 |      |
|-------------------------------------------------|------|
| carboxypyranocyanidin 3-O-glucoside             | CP1  |
| carboxypyranodelphinidin 3-O-glucoside          | CP2  |
| carboxypyranopetunidin 3-O-glucoside            | CP3  |
| carboxypyranopeonidin 3-O-glucoside             | CP4  |
| carboxypyranomalvidin 3-O-glucoside = vitisin A | CP5  |
| carboxypyranodelphinidin 3-O-acetylglucoside    | CP6  |
| carboxypyranopetunidin 3-O-acetylglucoside      | CP7  |
| carboxypyranopeonidin 3-O-acetylglucoside       | CP8  |
| carboxypyranomalvidin 3-O-acetylglucoside       | CP9  |
| carboxypyranopetunidin 3-O-coumaroylglucoside   | CP10 |
| carboxypyranopeonidin 3-O-coumaroylglucoside    | CP11 |
| carboxypyranomalvidin 3-O-coumaroylglucoside    | CP12 |

**Flavanol-anthocyanin adducts (mg/L malvidin-3-O-glucoside equivalent)**

|                                               |     |
|-----------------------------------------------|-----|
| (epi)catechin-cyanidin 3-O-glucoside          | FA1 |
| (epi)catechin-delphinidin 3-O-glucoside       | FA2 |
| (epi)catechin-petunidin 3-O-glucoside         | FA3 |
| (epi)catechin-peonidin 3-O-glucoside          | FA4 |
| (epi)catechin-malvidin 3-O-glucoside          | FA5 |
| (epi)catechin-peonidin 3-O-acetylglucoside    | FA6 |
| (epi)catechin-malvidin 3-O-acetylglucoside    | FA7 |
| (epi)catechin-malvidin 3-O-coumaroylglucoside | FA8 |

**Anthocyanin-flavanol adducts (A-type) (mg/L malvidin-3-O-glucoside equivalent)**

|                                                   |     |
|---------------------------------------------------|-----|
| cyanidin 3-O-glucoside -(epi)catechin (A-type)    | AF1 |
| delphinidin 3-O-glucoside -(epi)catechin (A-type) | AF2 |
| petunidin 3-O-glucoside -(epi)catechin (A-type)   | AF3 |
| peonidin 3-O-glucoside -(epi)catechin (A-type)    | AF4 |
| malvidin 3-O-glucoside-(epi)catechin (A-type)     | AF5 |

**Caftaric-anthocyanin adducts (mg/L malvidin-3-O-glucoside equivalent)**

|                                 |      |
|---------------------------------|------|
| caftaric-peonidin 3-O-glucoside | CAF1 |
| caftaric-malvidin 3-O-glucoside | CAF2 |

**Ethyl-flavanol dimers (mg/L catechin equivalent)**

|                                     |     |
|-------------------------------------|-----|
| (epi)catechin-ethyl-(epi)catechin-1 | EF1 |
|-------------------------------------|-----|

|                                                                                                     |      |
|-----------------------------------------------------------------------------------------------------|------|
| (epi)catechin-ethyl-(epi)catechin-2                                                                 | EF2  |
| <b>Flavanol-ethyl-anthocyanins (mg/L malvidin-3-O-glucoside equivalent)</b>                         |      |
| (epi)catechin-ethyl-peonidin 3-O-glucoside-1                                                        | FEA1 |
| (epi)catechin-ethyl-peonidin 3-O-glucoside-2                                                        | FEA2 |
| (epi)catechin-ethyl-peonidin 3-O-glucoside-3                                                        | FEA3 |
| (epi)catechin-ethyl-peonidin 3-O-glucoside-4                                                        | FEA4 |
| (epi)catechin-ethyl-malvidin 3-O-glucoside-1                                                        | FEA5 |
| (epi)catechin-ethyl-malvidin 3-O-glucoside-2                                                        | FEA6 |
| (epi)catechin-ethyl-malvidin 3-O-glucoside-3-4                                                      | FEA7 |
| (epi)catechin-ethyl-malvidin 3-O-coumaroylglucoside                                                 | FEA8 |
| <b>Phenylpyranoanthocyanins (mg/L malvidin-3-O-glucoside equivalent)</b>                            |      |
| p-hydroxyphenylpyranopeonidin 3-O-glucoside                                                         | PP1  |
| p-hydroxyphenylpyranomalvidin 3-O-glucoside                                                         | PP2  |
| p-hydroxyphenylpyranopeonidin 3-O-acetylglucoside                                                   | PP3  |
| p-hydroxyphenylpyranomalvidin 3-O-acetylglucoside                                                   | PP4  |
| p-hydroxyphenylpyranopeonidin 3-O-coumaroylglucoside                                                | PP5  |
| p-hydroxyphenylpyranomalvidin 3-O-coumaroylglucoside                                                | PP6  |
| p-hydroxyphenylpyranopetunidin 3-O-glucoside + catechylpyranopeonidin 3-O-glucoside                 | PP7  |
| catechylpyranomalvidin 3-O-glucoside (pinotin A)                                                    | PP8  |
| catechylpyranopetunidin 3-O-acetylglucoside                                                         | PP9  |
| catechylpyranopeonidin 3-O-acetylglucoside+p-hydroxyphenylpyranopetunidin 3-O-acetylglucoside       | PP10 |
| catechylpyranomalvidin 3-O-acetylglucoside                                                          | PP11 |
| catechylpyranopetunidin 3-O-coumaroylglucoside                                                      | PP12 |
| catechylpyranopeonidin 3-O-coumaroylglucoside+p-hydroxyphenylpyranopetunidin 3-O-coumaroylglucoside | PP13 |
| catechylpyranomalvidin 3-O-coumaroylglucoside                                                       | PP14 |
| guaiacylpyranomalvidin 3-O-glucoside                                                                | PP15 |
| guaiacylpyranomalvidin 3-O-acetylglucoside                                                          | PP16 |
| guaiacylpyranomalvidin 3-O-coumaroylglucoside                                                       | PP17 |
| syringylpyranomalvidin 3-O-glucoside                                                                | PP18 |
| <b>Flavanyl-pyranoanthocyanins (mg/L malvidin-3-O-glucoside equivalent)</b>                         |      |
| pyranopeonidin 3-O-glucoside-(epi)catechin                                                          | FPY1 |
| pyranomalvidin 3-O-glucoside-(epi)catechin                                                          | FPY2 |
| pyranomalvidin 3-O-coumaroylglucoside-(epi)catechin                                                 | FPY3 |
| <b>Others</b>                                                                                       |      |
| unknown 581 (mg/L malvidin-3-O-glucoside equivalent)                                                | U581 |
| unknown 551 (mg/L malvidin-3-O-glucoside equivalent)                                                | U551 |
| tryptophol                                                                                          | Al1  |
| tyrosol                                                                                             | Al2  |
| hydroxytyrosol                                                                                      | Al3  |
| tyrosine                                                                                            | AA1  |
| tryptophane                                                                                         | AA2  |
| glutathione (GSH)                                                                                   | GSH  |

oxidized glutathione (GSSG)

GSSG

**Enological variables**

pH

pH

Free SO<sub>2</sub>

FSO<sub>2</sub>

Combined SO<sub>2</sub>

CSO<sub>2</sub>

Alcohol (%)

ALC

**Color variables**

Color intensity

CI

Hue

H

L\*

L

a\*

a

b\*

b
